# Supplementary material for: The synthesis, characterization and flexible OFET application of three (Z)-1,2-bis(4-(tert-butyl)phenyl)ethane based copolymers
Source: Royal Society of Chemistry journal article supplement (doi:10.1039/c5py01647a), 2015-11-03
Supplement: c5py01647a1.pdf [file c5py01647a1.pdf]

## Supporting Information

### **The synthesis, characterization and flexible OFET application of three (Z)-1,2-bis(4-(tert-butyl)phenyl)ethane based copolymers**

Yuli Huang, Wei Huang, Junwei Yang, Ji Ma, Moyun Chen, Haoyun Zhu and Weizhi Wang\*

State Key Laboratory of Molecular Engineering of Polymers, Collaborative Innovation Center of  
Polymers and Polymer Composite Materials, Department of Macromolecular Science, Fudan  
University, Shanghai 200433, P. R. China.

E-mail: [weizhiwang@fudan.edu.cn](mailto:weizhiwang@fudan.edu.cn)

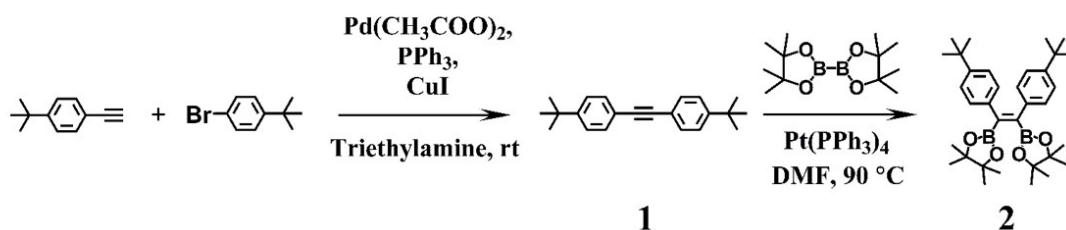

**Scheme S1** Synthesis of (*Z*)-1,2-bis(4-tert-butylphenyl)-1,2-bis(4,4,5,5-tetramethyl-1,3,2-dioxaborolan-2-yl)ethane.

**Synthesis of the monomers: 1,2-bis(4-tert-butylphenyl)ethyne (1)** The purchased 1-bromo-4-tert-butylbenzene (11.35 g, 53.29 mmol) and 1-tert-butyl-4-ethynylbenzene (8.43 g, 53.35 mmol) were both dissolved in triethylamine in the nitrogen surroundings. Then stir the mixture for about 10 min, follow by a catalytic amount of triphenylphosphine, CuI and Pd(II) acetate (P:Cu:Pd = 3:2:1) were added in the solution all at once. This reaction blend was heated under the reflux for 6 h until to appear absolute by a test named thin layer chromatogram, the mixture was chilled down, and the filtrate after filtering was concentrated in a vacuum circumstance. Finally, the product was purified through the column chromatography on silica gel to obtain the monomer **1** as white crystals in a yield of 86.5%. <sup>1</sup>H NMR (400 MHz, CD<sub>2</sub>Cl<sub>2</sub>), δ (TMS, ppm): 7.52 – 7.42 (m, 4H), 7.42 – 7.33 (m, 4H), 1.33 (s, 18H); <sup>13</sup>C NMR (100 MHz, CD<sub>2</sub>Cl<sub>2</sub>), δ (TMS, ppm): 151.56, 151.55, 151.54, 151.53, 151.52, 151.52, 131.19, 131.18, 131.16, 125.43, 125.43, 120.36, 88.79, 34.69, 34.68, 34.68, 31.01, 30.95, 30.92. Anal. Calcd for C<sub>22</sub>H<sub>26</sub> (290.44): C, 90.90; H, 9.10; Found: C, 91.01, H, 8.99.

**Synthesis of (*Z*)-1,2-bis(4-tert-butylphenyl)-1,2-bis(4,4,5,5-tetramethyl-1,3,2-dioxaborolan-2-yl)ethane (2).** A 100-mL flask equipped with a reflux condenser, a magnetic stirring bar and a septum inlet, was charged with a catalytic amount of tetrakis(triphenylphosphine)platinum (Pt(PPh<sub>3</sub>)<sub>4</sub>) and bis(pinacolato)diboron (10.08 g, 39.69 mmol) and then flushed with N<sub>2</sub>. DMF (80 mL) and **1** (11.52 g, 39.72 mmol) were individually added. After stirring for around 24 h at 90 °C, the acquired mixture was extracted with CH<sub>2</sub>Cl<sub>2</sub>. About 10 times of cold-water washing was used to remove DMF in succession, and dried over anhydrous magnesium sulfate ultimately. Kugelrohr distillation (0.15 mm Hg) delivered the monomer **2**, white crystals with 78.4% yield. <sup>1</sup>H NMR (400 MHz, CD<sub>2</sub>Cl<sub>2</sub>), δ (TMS, ppm): 7.13 – 7.06 (m, 4H), 6.87 – 6.73 (m, 4H), 1.32 (s, 24H), 1.24 (s, 18H); <sup>13</sup>C NMR (100 MHz, CD<sub>2</sub>Cl<sub>2</sub>), δ (TMS, ppm): 148.69, 138.77, 128.92, 128.91, 124.35, 84.01, 34.21, 34.20, 34.19, 31.03, 31.01, 31.00, 24.66. MS (MALDI-TOF): m/z (%): 567.320 (100) [M+Na]<sup>+</sup>. Anal. Calcd for C<sub>34</sub>H<sub>50</sub>B<sub>2</sub>O<sub>4</sub> (544.38): C, 74.95; H, 9.18; Found: C, 74.58; H, 9.33.

**Table S1** Summary of crystal data and reflection collection parameters for 1,2-bis(4-tert-butylphenyl)ethyne and (*Z*)-1,2-bis(4-tert-butylphenyl)-1,2-bis(4,4,5,5-

## tetramethyl-1,3,2-dioxaborolan-2-yl)ethane

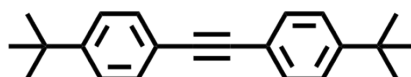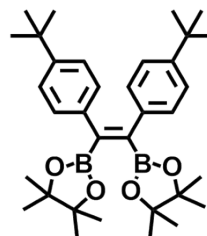

|                                                 |                                 |                                                               |
|-------------------------------------------------|---------------------------------|---------------------------------------------------------------|
| Empirical formula                               | C <sub>22</sub> H <sub>26</sub> | C <sub>34</sub> H <sub>50</sub> B <sub>2</sub> O <sub>4</sub> |
| Formula weight                                  | 290.43                          | 544.36                                                        |
| Crystal size, mm                                | 0.32 x 0.28 x 0.24              | 0.26 x 0.21 x 0.18                                            |
| Crystal system                                  | Monoclinic, P21/c               | Triclinic                                                     |
| space group                                     | P2(1)/c                         | P-1                                                           |
| a, Å                                            | 11.731(4)                       | 10.991(18)                                                    |
| b, Å                                            | 10.216(4)                       | 12.54(2)                                                      |
| c, Å                                            | 15.667(6)                       | 13.97(4)                                                      |
| a, deg                                          | 90                              | 108.83(5)                                                     |
| β, deg                                          | 96.915(7)                       | 103.58(5)                                                     |
| γ, deg                                          | 90                              | 104.77(3)                                                     |
| V, Å <sup>3</sup>                               | 1863.9(12)                      | 1653(6)                                                       |
| Z                                               | 4                               | 2                                                             |
| Calculated density, Mg/m <sup>3</sup>           | 1.035                           | 1.094                                                         |
| F(000)                                          | 632                             | 592                                                           |
| Temperature, K                                  | 293(2)                          | 296(2)                                                        |
| Wavelength, Å                                   | 0.71073                         | 0.71073                                                       |
| μ(Mo Ka), mm <sup>-1</sup>                      | 0.058                           | 0.068                                                         |
| 2θ <sub>max</sub> , deg (Completeness )         | 25.00 (99.8 %)                  | 24.99(97.8 %)                                                 |
| no. of collected reflections                    | 9206                            | 8152                                                          |
| no. of unique ref.(R <sub>int</sub> )           | 3272 (0.0387)                   | 5701 (0.0933)                                                 |
| Data/restraints/parameters                      | 3272 / 6 / 200                  | 5701 / 0 / 362                                                |
| R <sub>1</sub> , wR <sub>2</sub> [obs I>2σ (I)] | 0.0967, 0.1832                  | 0.1322, 0.2363                                                |
| R <sub>1</sub> , wR <sub>2</sub> (all data)     | 0.1394, 0.1951                  | 0.1805, 0.2686                                                |
| residual peak/hole, e. Å <sup>-3</sup>          | 0.486 /-0.290                   | 0.436/-0.302                                                  |
| transmission ratio                              | 0.9863 /0.9817                  | 0.9878/0.9824                                                 |
| Goodness-of-fit on F <sup>2</sup>               | 1.013                           | 1.196                                                         |

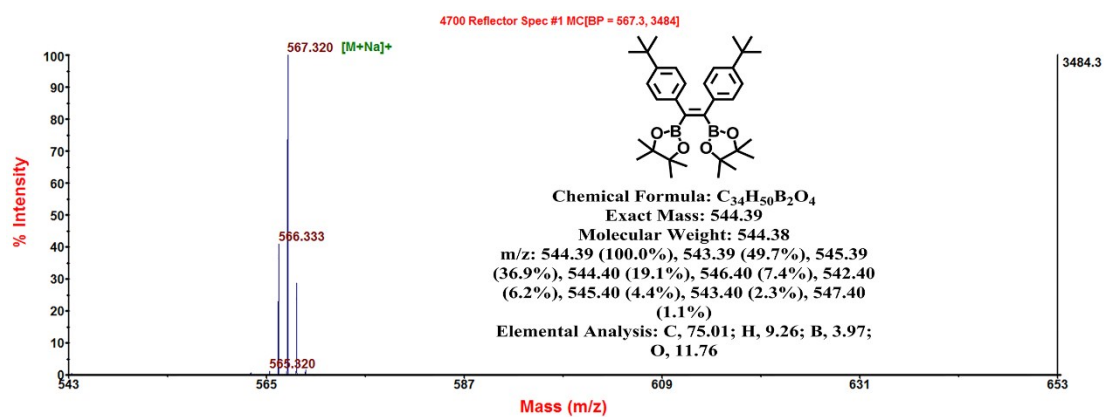

**Fig. S1** The MALDI-TOF of (Z)-1,2-bis(4-tert-butylphenyl)-1,2-bis(4,4,5,5-tetramethyl-1,3,2-dioxaborolan-2-yl)ethane.

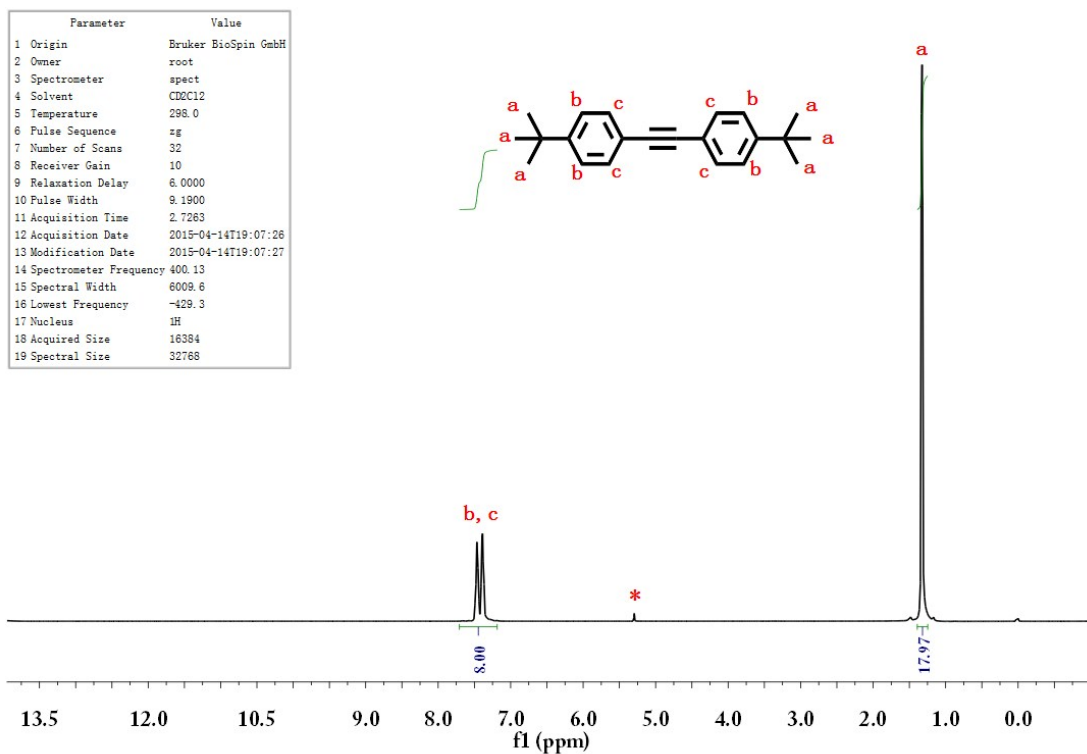

**Fig. S2** The <sup>1</sup>H-NMR spectrum of 1,2-bis(4-tert-butylphenyl)ethyne.

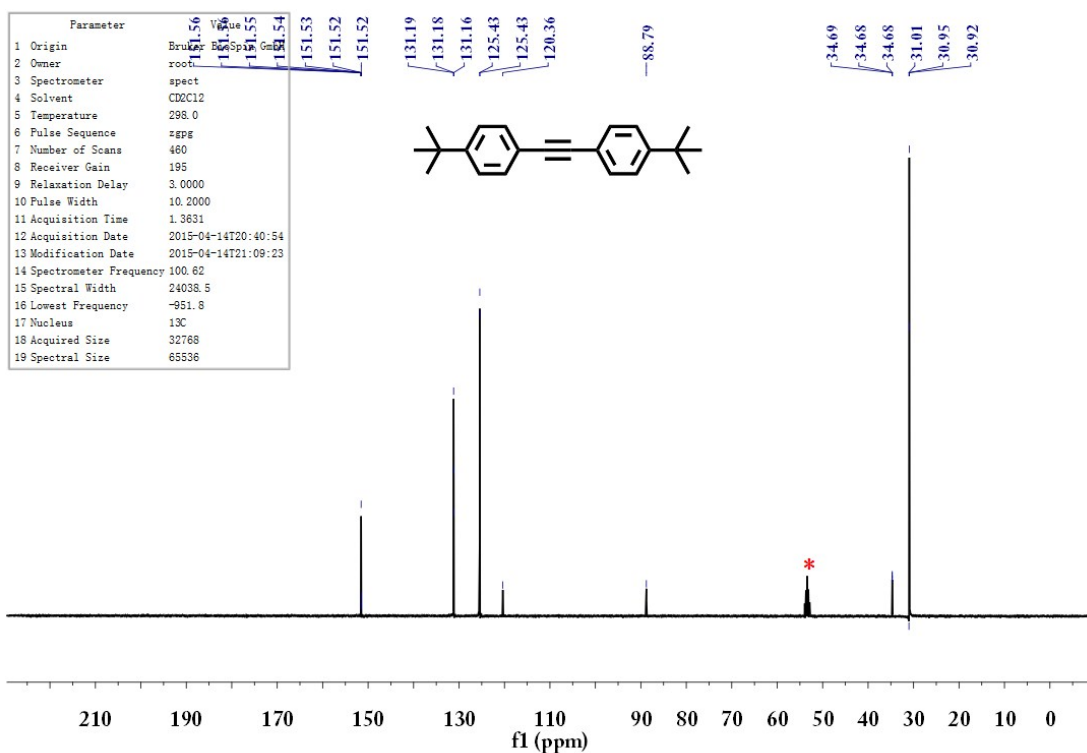

**Fig. S3** The <sup>13</sup>C-NMR spectrum of 1,2-bis(4-tert-butylphenyl)ethyne.

| Parameter                 | Value               |
|---------------------------|---------------------|
| 1 Origin                  | Bruker BioSpin GmbH |
| 2 Owner                   | root                |
| 3 Spectrometer            | spect               |
| 4 Solvent                 | CDCl <sub>3</sub>   |
| 5 Temperature             | 298.0               |
| 6 Pulse Sequence          | zg                  |
| 7 Number of Scans         | 32                  |
| 8 Receiver Gain           | 10                  |
| 9 Relaxation Delay        | 6.0000              |
| 10 Pulse Width            | 9.1900              |
| 11 Acquisition Time       | 2.7263              |
| 12 Acquisition Date       | 2015-04-14T19:17:40 |
| 13 Modification Date      | 2015-04-14T19:17:41 |
| 14 Spectrometer Frequency | 400.13              |
| 15 Spectral Width         | 6009.6              |
| 16 Lowest Frequency       | -429.3              |
| 17 Nucleus                | <sup>1</sup> H      |
| 18 Acquired Size          | 16384               |
| 19 Spectral Size          | 32768               |

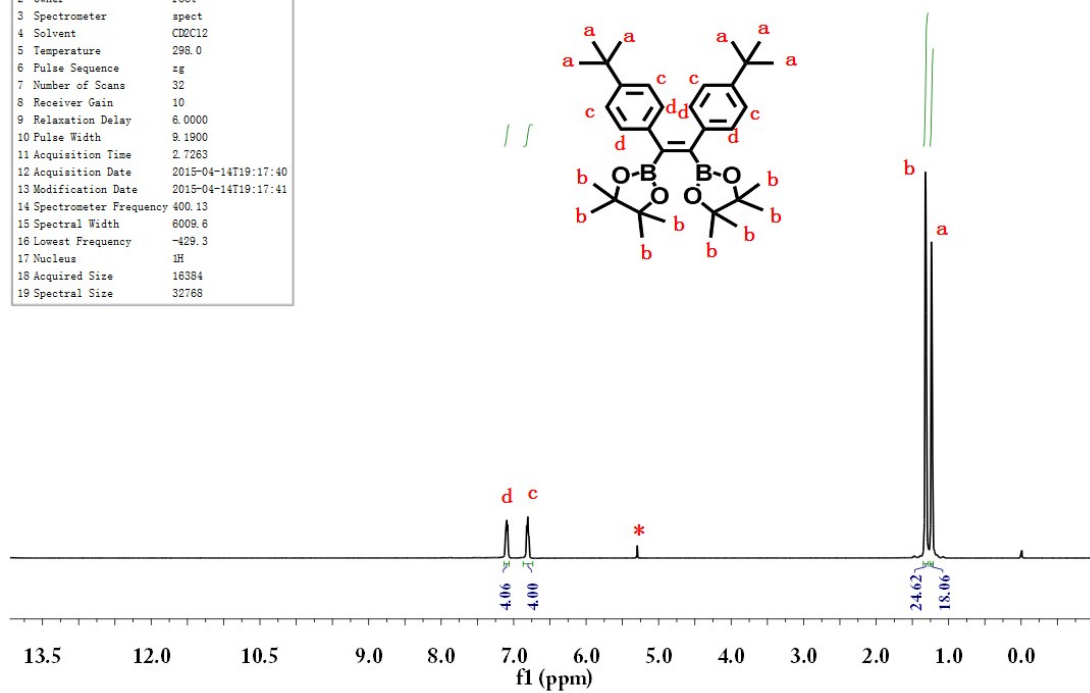

**Fig. S4** The <sup>1</sup>H-NMR spectrum of (Z)-1,2-bis(4-tert-butylphenyl)-1,2-bis(4,4,5,5-tetramethyl-1,3,2-dioxaborolan-2-yl)ethane.

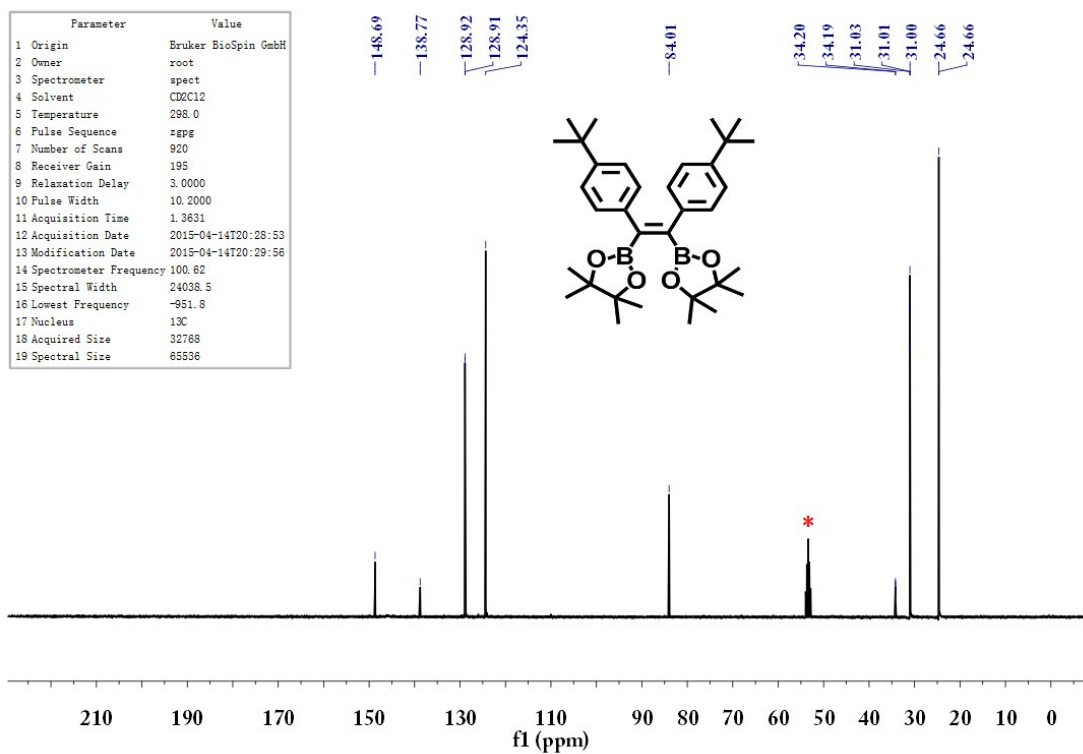

**Fig. S5** The <sup>13</sup>C-NMR spectrum of (*Z*)-1,2-bis(4-tert-butylphenyl)-1,2-bis(4,4,5,5-tetramethyl-1,3,2-dioxaborolan-2-yl)ethane.

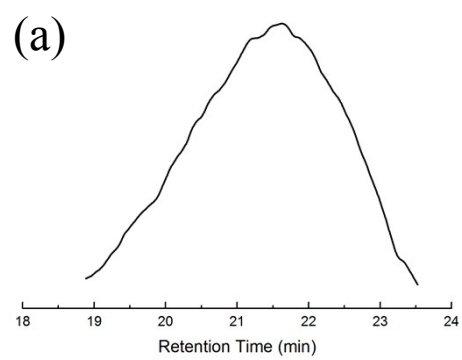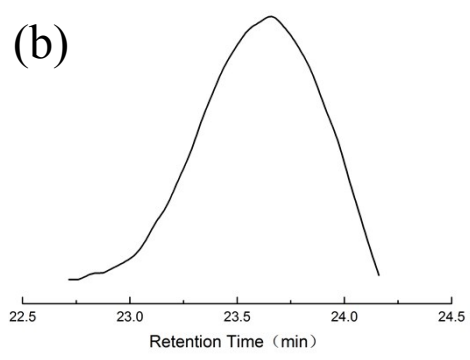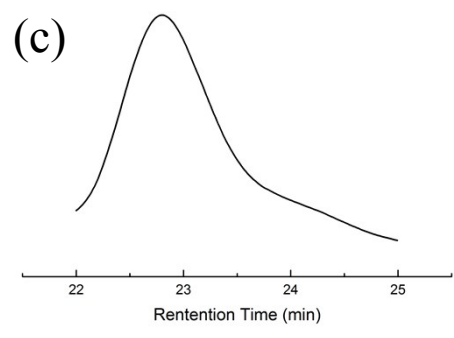

**Fig. S6** GPC data of (a) PBPT, (b) PBPTT and (c) PBPDT



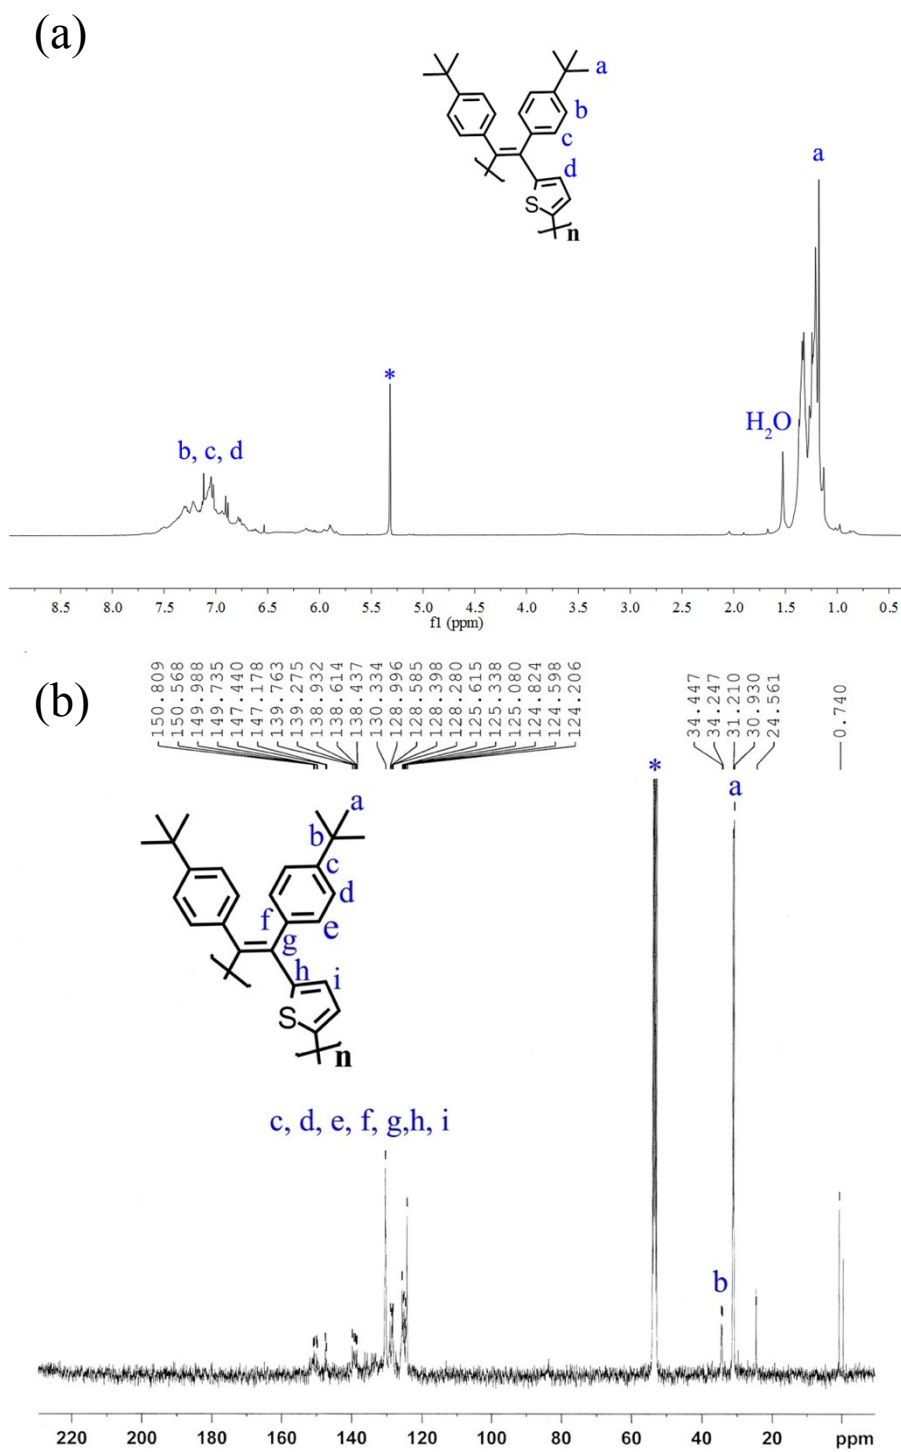

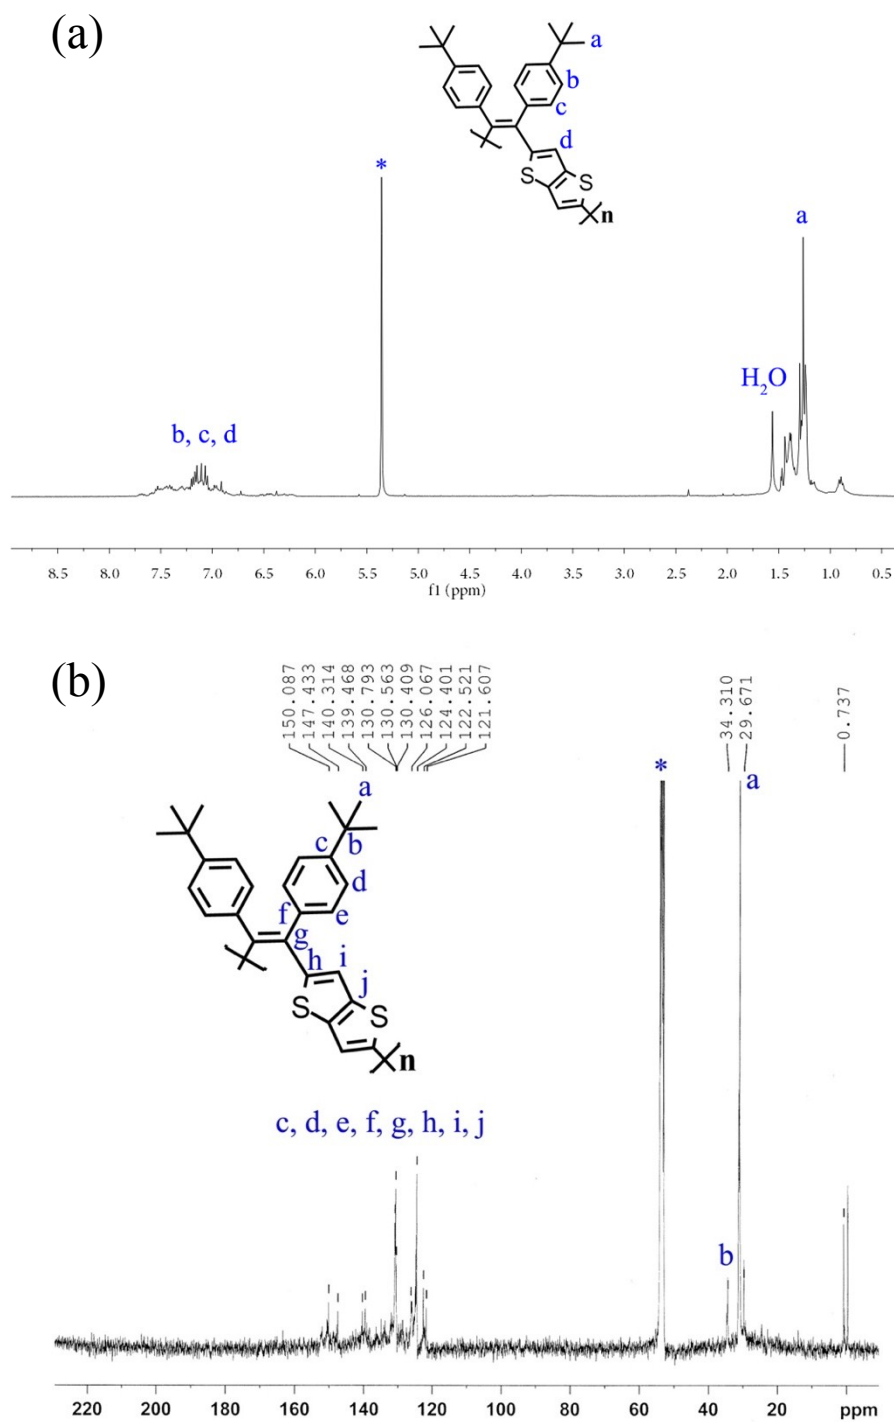

**Fig. S8** (a)<sup>1</sup>H-NMR and (b)<sup>13</sup>C-NMR spectra of PBPTT

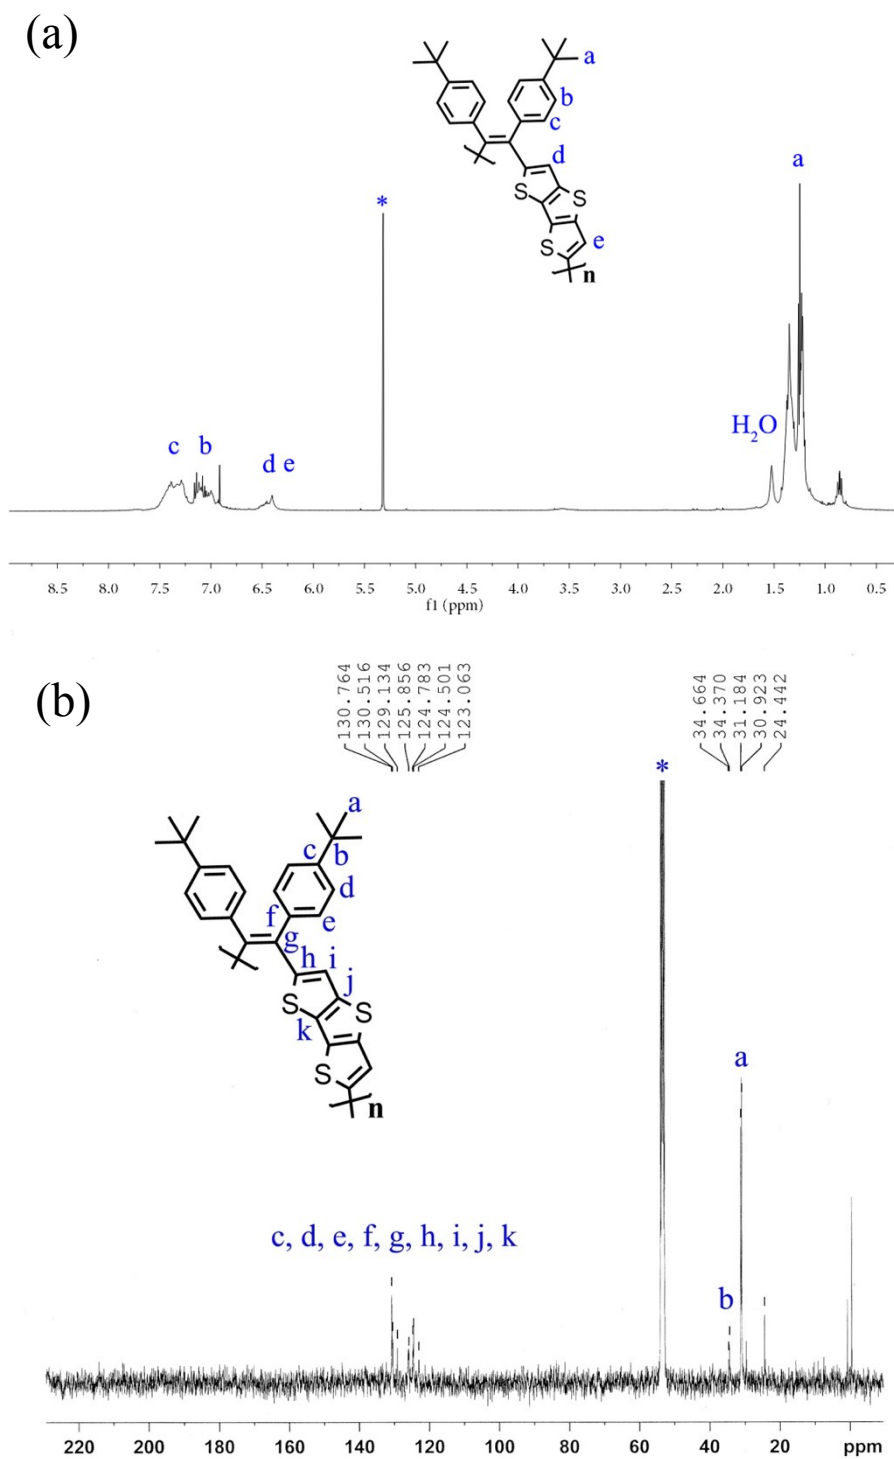

**Fig. S9** (a)<sup>1</sup>H-NMR and (b)<sup>13</sup>C-NMR spectra of PBPDT

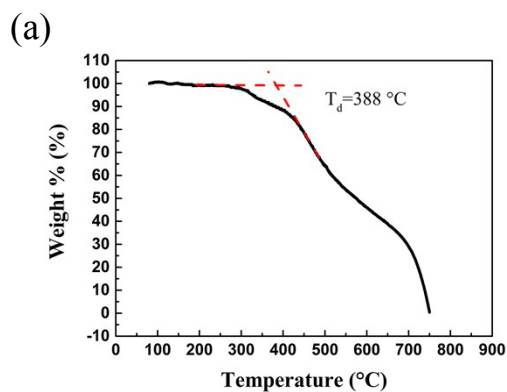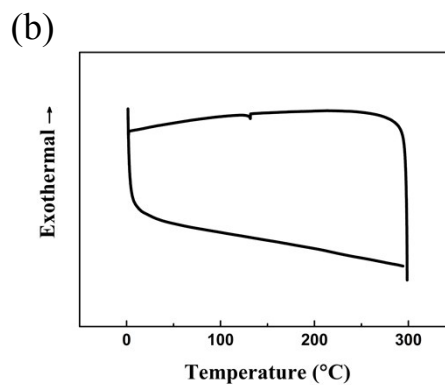

**Fig. S10** (a)TGA and (b)DSC curves of PBPT

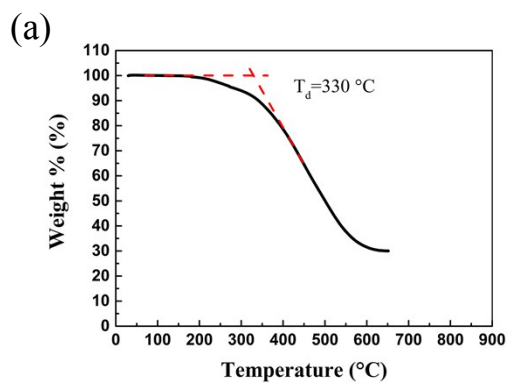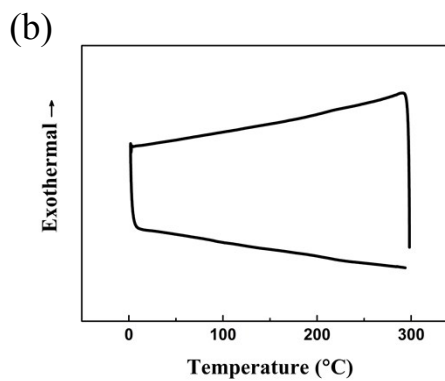

**Fig. S11** (a)TGA and (b)DSC curves of PBPTT

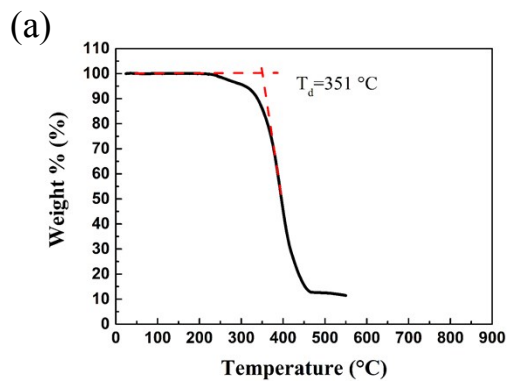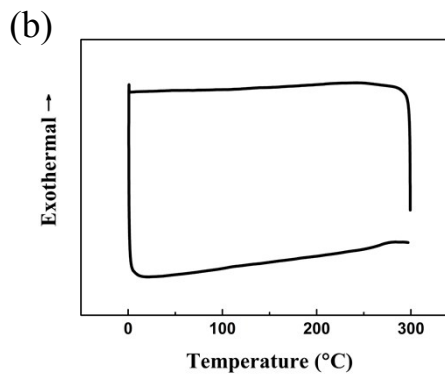

**Fig. S12** (a)TGA and (b)DSC curves of PBPDT

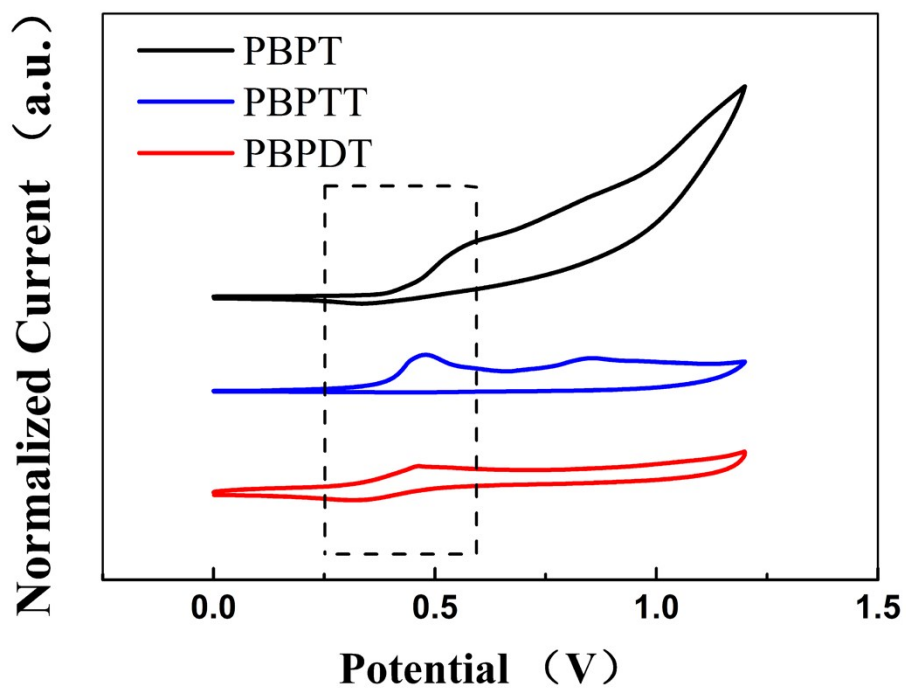

Fig. S13 Cyclic voltammograms of PBPT, PBPTT and PBPDT

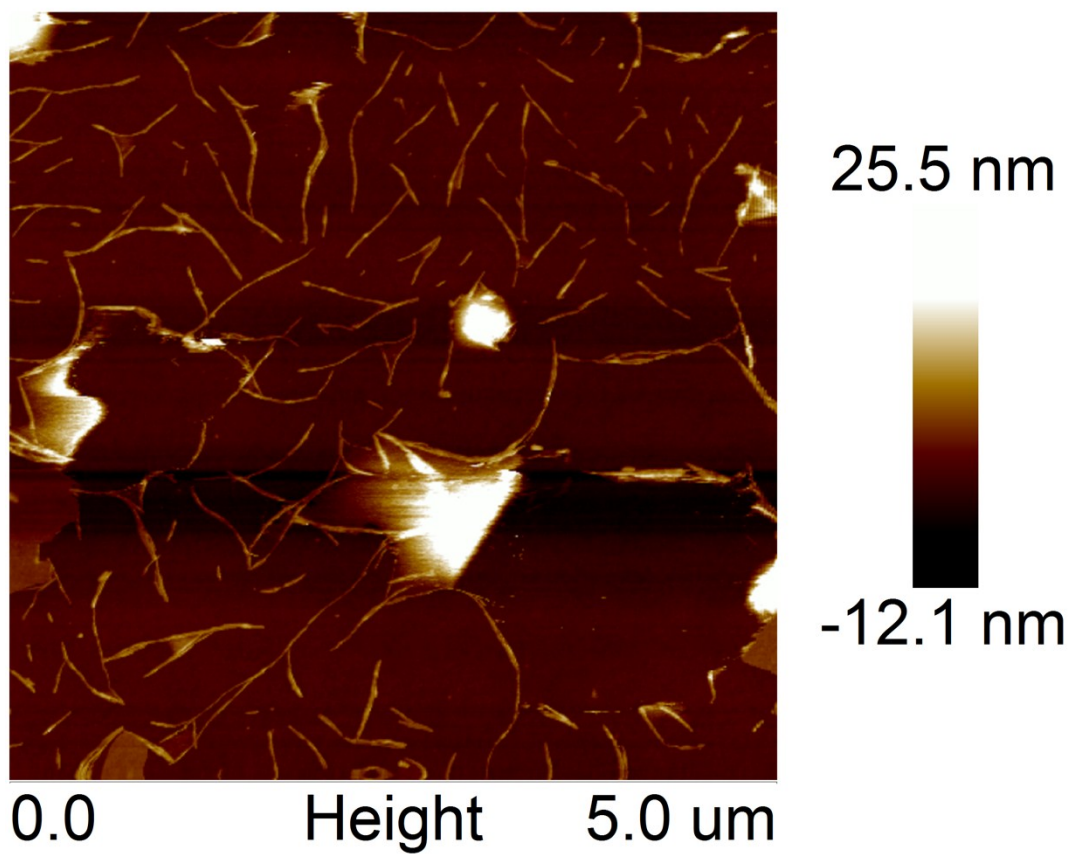

**Fig. S14** AFM photo of PBPTT film.

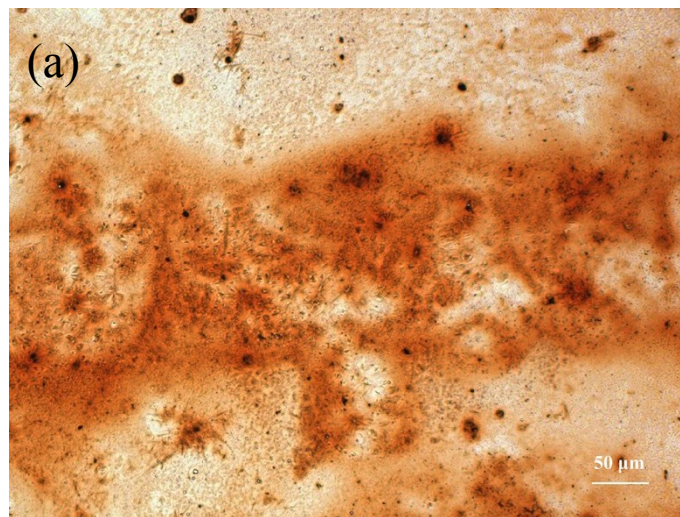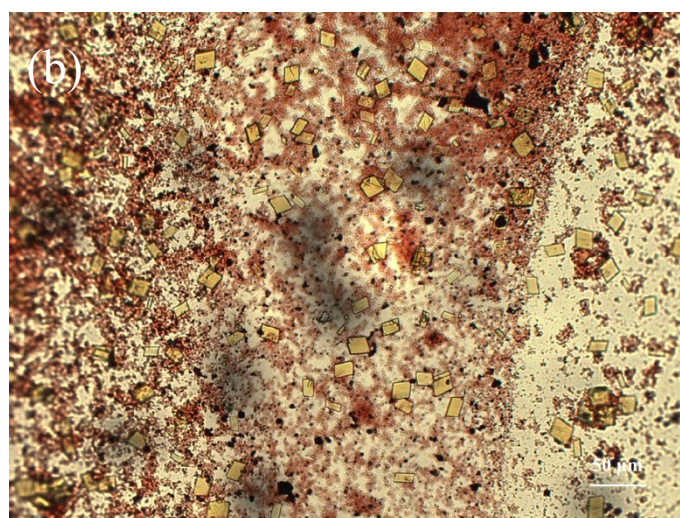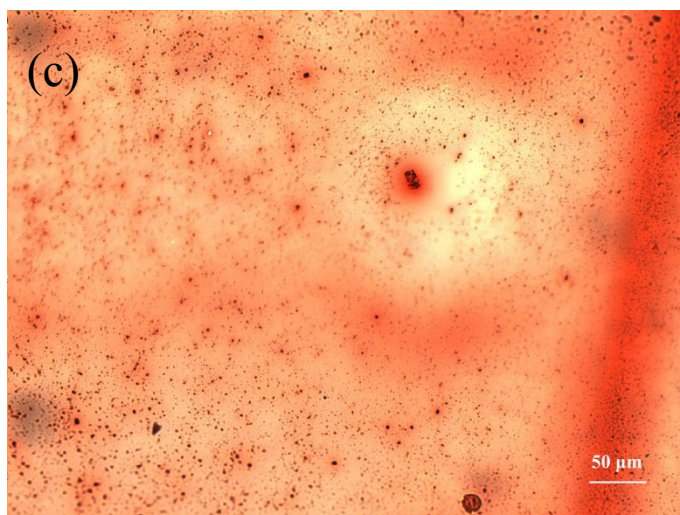

**Fig. S15** POM photos of (a) PBPT, (b) PBPTT and (c) PBPDT in the bright field.

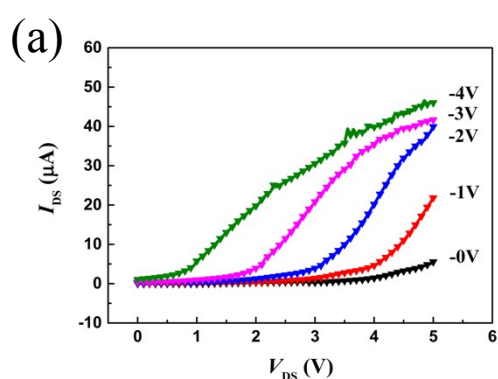

(b)

Summary

|   | Intercept |                | Slope    |                | Statistics    |
|---|-----------|----------------|----------|----------------|---------------|
|   | Value     | Standard Error | Value    | Standard Error | Adj. R-Square |
| C | 0.00109   | 1.63026E-5     | -0.00118 | 7.4762E-6      | 0.98809       |

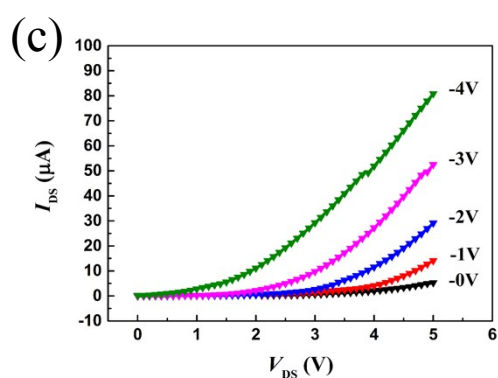

(d)

Summary

|   | Intercept   |                | Slope    |                | Statistics    |
|---|-------------|----------------|----------|----------------|---------------|
|   | Value       | Standard Error | Value    | Standard Error | Adj. R-Square |
| B | -2.37392E-4 | 1.85772E-5     | -0.00184 | 8.50148E-6     | 0.99872       |

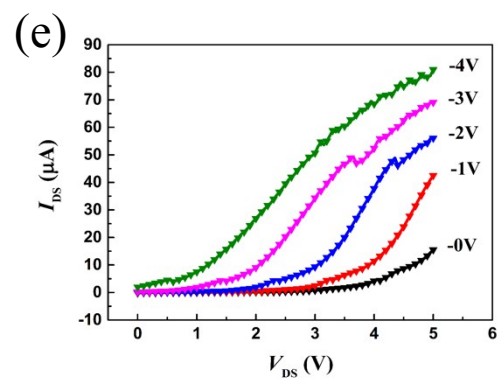

(f)

Summary

|   | Intercept   |                | Slope    |                | Statistics    |
|---|-------------|----------------|----------|----------------|---------------|
|   | Value       | Standard Error | Value    | Standard Error | Adj. R-Square |
| C | -1.93988E-4 | 3.33355E-5     | -0.00173 | 1.52873E-5     | 0.97708       |

**Fig. S16** The output curves of OFET devices based on (a) PBPT, (c) PBPTT and (e) PBPDT. The linear fitting information of OFET devices based on (b) PBPT, (d) PBPTT and (f) PBPDT.



**(a)**

| Summary |             |                |          |                |               |
|---------|-------------|----------------|----------|----------------|---------------|
|         | Intercept   |                | Slope    |                | Statistics    |
|         | Value       | Standard Error | Value    | Standard Error | Adj. R-Square |
| B       | -5.10854E-4 | 2.04896E-5     | -0.00176 | 9.39635E-6     | 0.99155       |

**(b)**

| Summary |             |                |          |                |               |
|---------|-------------|----------------|----------|----------------|---------------|
|         | Intercept   |                | Slope    |                | Statistics    |
|         | Value       | Standard Error | Value    | Standard Error | Adj. R-Square |
| B       | -3.73099E-4 | 1.56039E-5     | -0.00173 | 7.15581E-6     | 0.99491       |

**Fig. S17** The linear fitting information of OFET device based on PBPTT in two bending condition. (a) belongs to the condition shown in Fig. 5 (a), while (b) belongs to the condition shown in Fig. 5 (d)

**Table S2** The characteristics and performance of the OFET device based on PBPTT during two weeks.

| Time<br>(day) | $\mu$<br>( $\text{cm}^2\text{V}^{-1}\text{s}^{-1}$ ) | on/off ratio      | $V_{\text{TH}}$<br>(V) |
|---------------|------------------------------------------------------|-------------------|------------------------|
| 0             | 0.27                                                 | $1 \times 10^4$   | -0.13                  |
| 2             | 0.36                                                 | $1.4 \times 10^4$ | -0.09                  |
| 4             | 0.38                                                 | $8.1 \times 10^3$ | -0.27                  |
| 6             | 0.40                                                 | $6.8 \times 10^3$ | -0.19                  |
| 8             | 0.28                                                 | $3.8 \times 10^3$ | -0.09                  |
| 10            | 0.38                                                 | $2.9 \times 10^3$ | -0.14                  |
| 12            | 0.32                                                 | $1.5 \times 10^3$ | -0.20                  |
| 14            | 0.50                                                 | $1.6 \times 10^3$ | -0.70                  |

**Fig. S18** The transfer plots, output curves and linear fitting information of the OFET device based on PBPTT during two weeks:

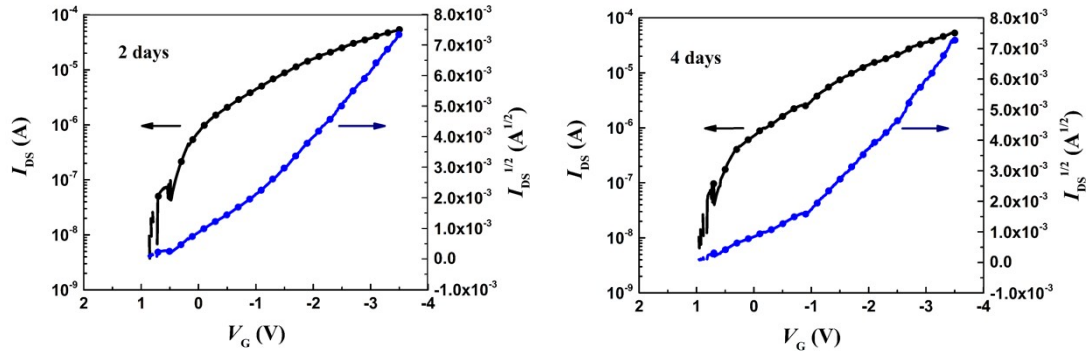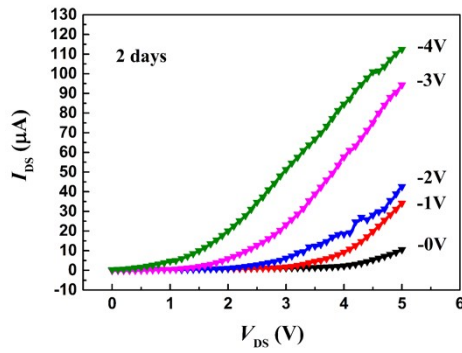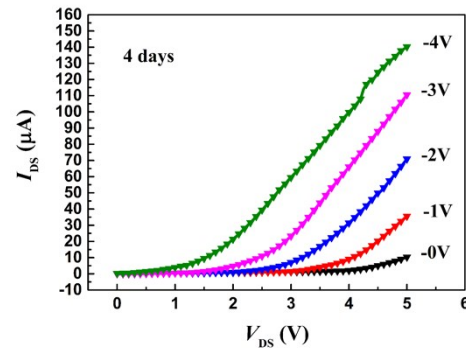

**2 days**

*Summary*

|   | Intercept   |                | Slope    |                | Statistics    |
|---|-------------|----------------|----------|----------------|---------------|
|   | Value       | Standard Error | Value    | Standard Error | Adj. R-Square |
| C | -1.88655E-4 | 1.37592E-5     | -0.00211 | 5.82084E-6     | 0.9981        |

**4 days**

*Summary*

|   | Intercept   |                | Slope    |                | Statistics    |
|---|-------------|----------------|----------|----------------|---------------|
|   | Value       | Standard Error | Value    | Standard Error | Adj. R-Square |
| C | -5.85365E-4 | 2.69769E-5     | -0.00218 | 1.14126E-5     | 0.9932        |

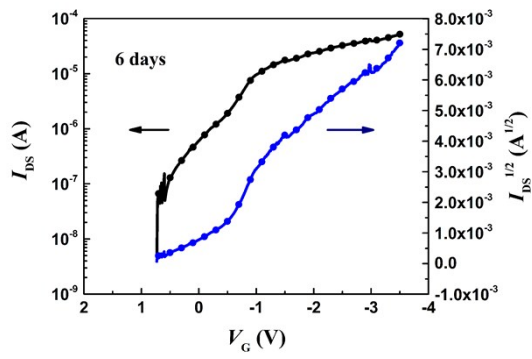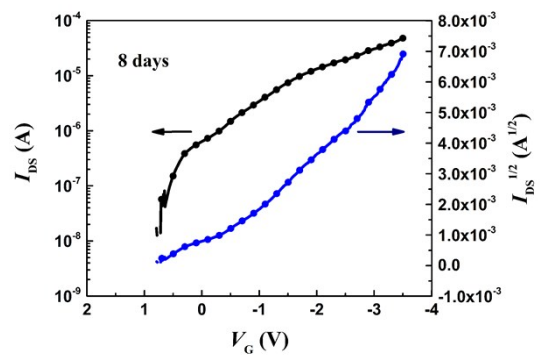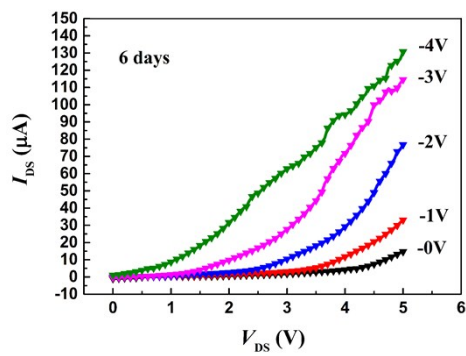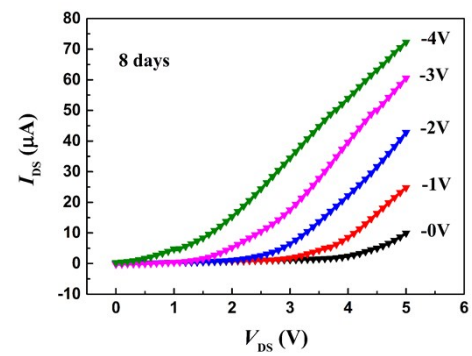

6 days

8 days

Summary

|   | Intercept |                | Slope    |                | Statistics    |
|---|-----------|----------------|----------|----------------|---------------|
|   | Value     | Standard Error | Value    | Standard Error | Adj. R-Square |
| C | 0.00182   | 1.89393E-5     | -0.00151 | 8.01226E-6     | 0.99302       |

Summary

|   | Intercept   |                | Slope   |                | Statistics    |
|---|-------------|----------------|---------|----------------|---------------|
|   | Value       | Standard Error | Value   | Standard Error | Adj. R-Square |
| C | -1.62886E-4 | 2.35618E-5     | -0.0019 | 9.9678E-6      | 0.99319       |

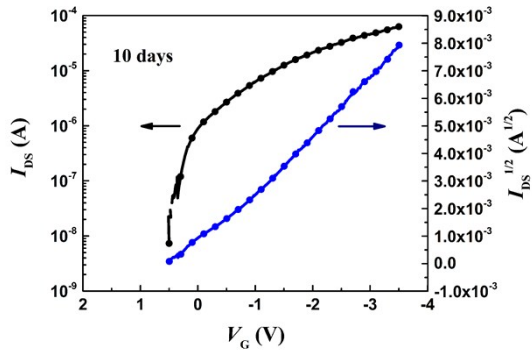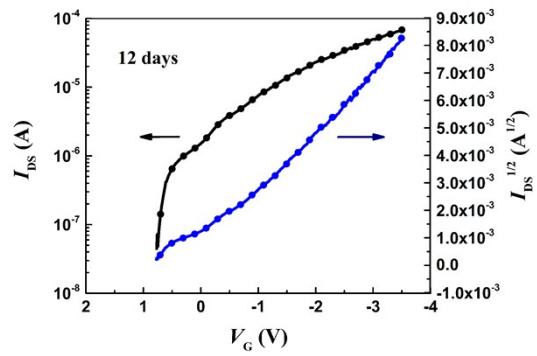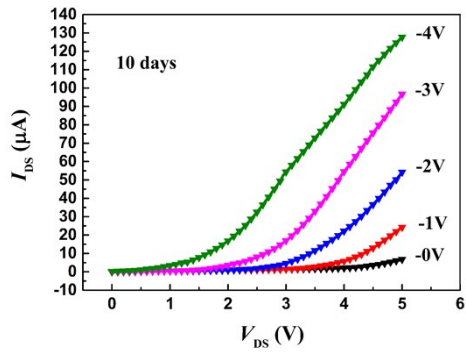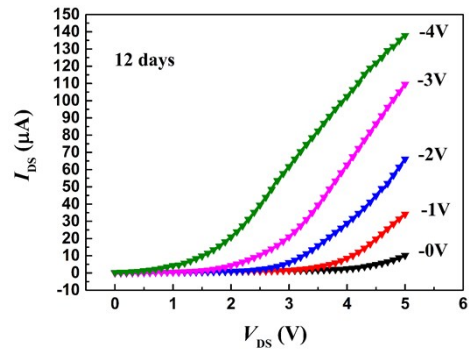

10 days

12 days

Summary

|   | Intercept |                | Slope    |                | Statistics    |
|---|-----------|----------------|----------|----------------|---------------|
|   | Value     | Standard Error | Value    | Standard Error | Adj. R-Square |
| C | 2.9309E-4 | 5.58783E-6     | -0.00217 | 2.36393E-6     | 0.9997        |

Summary

|   | Intercept  |                | Slope   |                | Statistics    |
|---|------------|----------------|---------|----------------|---------------|
|   | Value      | Standard Error | Value   | Standard Error | Adj. R-Square |
| C | 4.01014E-4 | 1.47514E-5     | -0.0022 | 6.24056E-6     | 0.99798       |

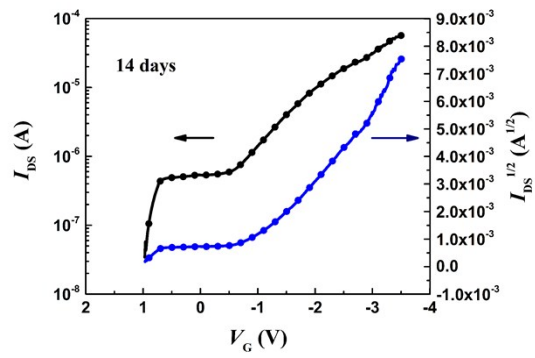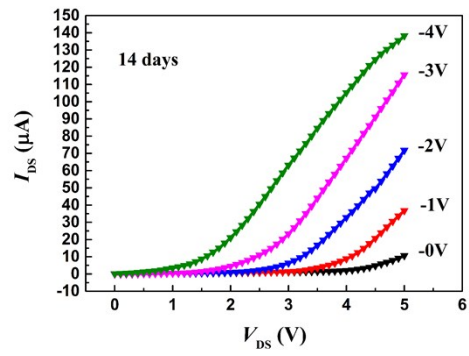

**14 days**

*Summary*

|   | Intercept |                | Slope    |                | Statistics    |
|---|-----------|----------------|----------|----------------|---------------|
|   | Value     | Standard Error | Value    | Standard Error | Adj. R-Square |
| C | -0.00174  | 4.71887E-5     | -0.00249 | 1.99632E-5     | 0.98419       |
